# From head to tail: A neuromechanical model of forward locomotion in *C. elegans*

Article submitted to Philosophical Transactions of the Royal Society B. Special Issue: Connectome to behaviour: Modelling *C. elegans* at cellular resolution

Eduardo J. Izquierdo and Randall D. Beer

Cognitive Science Program, School of Informatics, Computing, and Engineering, Indiana University

## Keywords:

invertebrate, locomotion, motor control, neuromechanical model, proprioception

## Author for correspondence:

Eduardo J. Izquierdo

e-mail: [edizquie@indiana.edu](mailto:edizquie@indiana.edu)

With 302 neurons and a near complete reconstruction of the neural and muscle anatomy at the cellular level, *C. elegans* is an ideal candidate organism to study the neuromechanical basis of behavior. Yet, despite the breadth of knowledge about the neurobiology, anatomy and physics of *C. elegans*, there are still a number of unanswered questions about one of its most basic and fundamental behaviors: forward locomotion. How the rhythmic pattern is generated and propagated along the body is not yet well understood. We report on the development and analysis of a model of forward locomotion that integrates the neuroanatomy, neurophysiology and body mechanics of the worm. Our model is motivated by recent experimental analysis of the structure of the ventral cord circuitry and the effect of local body curvature on nearby motoneurons, as well as by the lack of consideration of the role of the head motoneurons in current models of locomotion. We developed a neuroanatomically-grounded model of the head and ventral nerve cord subcircuits, using a neural model capable of reproducing the full range of electrophysiology observed in *C. elegans* neurons. We integrated the neural model with an existing biomechanical model of the worm's body, with updated musculature and stretch receptors. Unknown parameters were evolved using an evolutionary algorithm to match the speed of the worm on agar. We performed 100 evolutionary runs and consistently found electrophysiological configurations that reproduced realistic control of forward movement. The ensemble of successful solutions reproduced key experimental observations that they were not designed to fit, including the wavelength and frequency of the propagating wave. Analysis of the ensemble revealed that SMD and RMD are sufficient to drive dorsoventral undulations in the head and neck and that short-range posteriorly-directed proprioceptive feedback is sufficient to propagate the wave along the rest of the body.

## 1 Introduction

2

2 Behavior is grounded in the interaction between an organism's brain, its body, and its  
3 environment. How simple neuronal circuits interact with their muscles and mechanical bodies  
4 to generate behavior is not yet well understood. With 302 neurons and a near complete  
5 reconstruction of the neural and muscle anatomy at the cellular level [1], *C. elegans* is an ideal  
6 candidate organism to understand the neuromechanical basis of behavior.

7 Locomotion is essential to most living organisms. Since nearly the entire behavioral repertoire  
8 of *C. elegans* is expressed through movement, understanding the neuromechanical basis of  
9 locomotion is especially critical as a foundation upon which analyses of all other behaviors  
10 must build. *C. elegans* locomotes in an undulatory fashion, generating thrust by propagating  
11 dorsoventral bends along its body. Movement is generated by body wall muscles arranged  
12 in staggered pairs along four bundles [2]. The anterior-most muscles are driven by a head  
13 motorneuron circuit and the rest of the muscles are driven by motorneurons in the ventral  
14 nerve cord (VNC). Although the nematode is not segmented, a statistical analysis of the VNC  
15 motorneurons in relation to the position of the muscles they innervate revealed a repeating neural  
16 unit [3]. Interestingly, while the repeating neural units in the VNC are inter-connected via a set of  
17 chemical and electrical synapses, the head circuit is largely disconnected from the rest of the VNC  
18 neural units. Motorneurons in both the head and the VNC circuit have been long postulated to  
19 be mechanosensitive to stretch [1, 4, 5], and evidence in support of this has been shown recently  
20 for the VNC [6]. Despite all of this anatomical knowledge, how the rhythmic pattern is generated  
21 and propagated along the body during forward locomotion on agar is not yet well understood.

22 A number of computational models of *C. elegans* locomotion have been proposed (see  
23 reviews [7, 8, 9]). The model described in this paper differs from previous models in four  
24 main ways. First, our model of the VNC incorporates the recent analysis of its repeating  
25 structure [3]. Second, our model of stretch-receptors feedback takes into consideration recent  
26 findings regarding the range and directionality of local body curvature on motoneurons [6]. Third,  
27 our model takes into consideration the head motorneuron circuit, which had been largely ignored  
28 in most models of locomotion, by either replicating an additional VNC unit or adding an oscillator  
29 in the head. Finally, all current models have assumed specific mechanisms for how the rhythmic  
30 movement is generated and propagated, with little systematic exploration of the possibilities.

31 Here we present a model of forward locomotion grounded in the neurobiology, anatomy, and  
32 physics of the worm. The model integrates a head motorneuron circuit based on hypotheses  
33 postulated in the original "Mind of the Worm" paper [1] with a model of a repeating neural  
34 unit in the ventral nerve cord based on a statistical analysis of the available connectome data [3].  
35 Motorneurons innervate an anatomically grounded model of the muscles. Stretch receptors  
36 are modeled to match recent experimental evidence on the effect of local body curvature on  
37 nearby motorneurons [6]. The neuromuscular system is embedded in a model of the physics  
38 of the worm's body [10]. We used an evolutionary algorithm to explore the space of unknown  
39 parameters of the head and VNC motorneuron circuits such that the integrated neuromechanical  
40 model matched the speed of the worm during forward locomotion on agar. Analysis of successful  
41 solutions suggests that sensory feedback mechanisms in the head and the VNC are sufficient  
42 to generate and propagate dorsoventral waves that account for forward locomotion behavior.  
43 Detailed analysis of the operation of the model sheds further light on the mechanisms that  
44 generate and propagate oscillations and leads to a number of experimental predictions.

## 45 Model

### 46 Environment properties

47 In the laboratory, *C. elegans* is typically grown and studied in petri dishes containing a layer  
48 of agar gel. The gel is firm and worms tend to lie on the surface. The locomotion behavior

49 observed under these conditions is referred to as crawling. Worms are sometimes also studied in  
50 a liquid medium such as water, leading to a different locomotion behavior called swimming. The  
51 experiments in this paper will focus only on agar gel. Given the low Reynolds number physics  
52 of *C. elegans* locomotion, inertial forces can be neglected and the resistive forces of the medium  
53 can be well-approximated as a linear drag  $F = -Cv$  [10, 11, 12, 13]. The tangential and normal  
54 drag coefficients for agar have been estimated to be  $C_{\parallel} = 3.2 \times 10^{-3} \text{ kg}\cdot\text{s}^{-1}$  and  $C_{\perp} = 128 \times 10^{-3}$   
55  $\text{kg}\cdot\text{s}^{-1}$ , respectively [10, 11, 13, 14, 15, 16].

## 56 Body model

57 The model of the body is a reimplementation of the model presented by Boyle, Berri, and  
58 Cohen [10]. The worm is modeled in 2D cross-section. This is justified because when placed  
59 on an agar surface, the worm locomotes on its side, bending only in the dorsal-ventral plane.  
60 The  $\sim 1\text{mm}$  long continuous body of the worm is divided into variable-width discrete segments  
61 (Fig. 1A), each of which are bounded by two cross-sectional rigid rods (black) whose endpoints  
62 are connected to their neighbors via damped spring lateral elements (red) modeling the stretch  
63 resistance of the cuticle and damped spring diagonal elements (blue) modeling the compression  
64 resistance of internal pressure. The rest lengths, spring constants and damping constants of the  
65 lateral and diagonal elements are taken directly from previous work [10], who in turn estimated  
66 them from experiments with anesthetized worms [17]. The forces from the lateral and diagonal  
67 elements are summed at the endpoints of the rods and then the equations of motion are written  
68 for the center of mass of each rod. Since each rod has two translational ( $x, y$ ) and one rotational  
69 ( $\phi$ ) degrees of freedom, the body model has a total of  $3(N_{\text{seg}} + 1)$  degrees of freedom. The current  
70 model has  $N_{\text{seg}} = 50$ , so a total of 153 degrees of freedom. All kinematic and dynamic parameters  
71 are identical to those used in [10].

## 72 Muscles

73 Body wall muscles in the worm are arranged as staggered pairs in four bundles around the body  
74 and are divided into 16 in the head, 16 in the neck and 63 in the rest of the body [2, 18]. These  
75 muscles can contract and relax in the dorsoventral plane. Unlike previous work [10], we do not  
76 directly associate each discrete lateral element of the body model with a distinct muscle. Instead,  
77 muscles are modeled as separate damped springs that lie along the cuticle and their force is  
78 distributed across all lateral elements that they intersect (Fig. 1B). This allows us to vary the spatial  
79 resolution of the body discretization independently from the number of muscles. It also allows us  
80 to accommodate the fact that adjacent body wall muscles overlap one another in *C. elegans*. Since  
81 the model is 2D, we combine right and left bundles into a single set of 24 dorsal and 24 ventral  
82 muscles, each with twice the strength. Following previous work [10], muscles are modeled as  
83 damped springs with activation-dependent rest lengths, spring constants and damping constants,  
84 endowing them with simplified Hill-like force-length and force-velocity properties [19]. Muscle  
85 activation is modeled as a leaky integrator with a characteristic time scale ( $\tau_M = 100\text{ms}$ ), which  
86 crudely agrees with response times of obliquely striated muscle [20]. The muscle activation is  
87 represented by the unitless variable  $A_{M,m}^k$  that evolves according to

$$\frac{dA_{M,m}^k}{dt} = \frac{1}{\tau_M} (I_{NMJ,m}^k - A_{M,m}^k) \quad (0.1)$$

88 where  $I_{NMJ,m}^k$  is the total current driving the muscle. Also following previous work [10], inter-  
89 muscle electrical coupling is assumed to be too weak and therefore not included in the model.

## 90 Head motorneuron circuit

91 In the worm, the head and neck muscles are driven by a set of motorneuron classes that include:  
92 bilaterally symmetric RIM, RIV, RMF, RMG, RMH; fourfold symmetric RME, SMB, URA; and

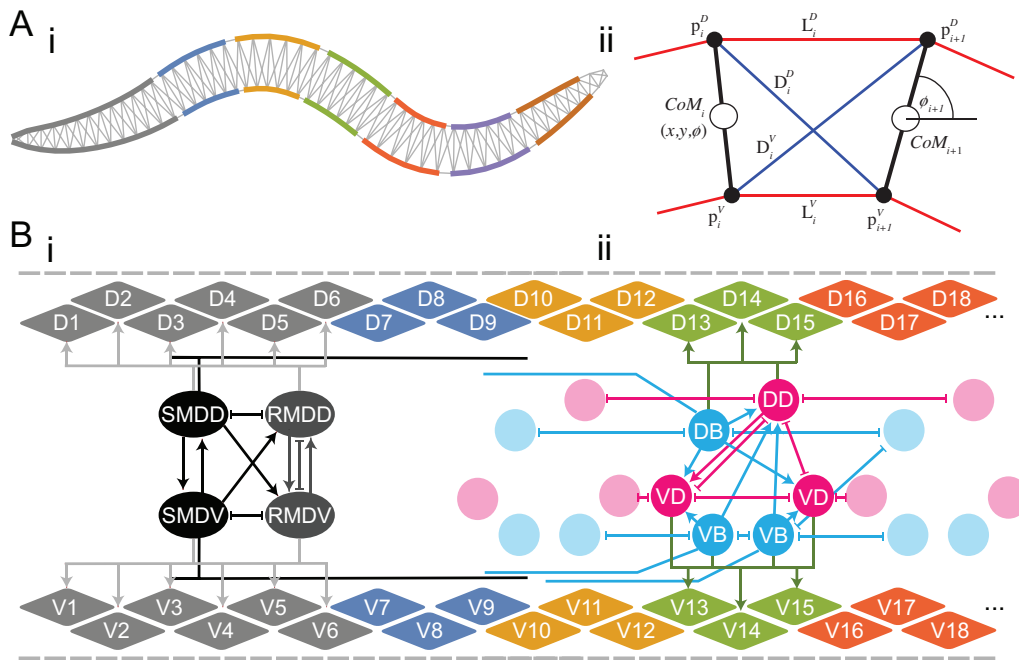

**Figure 1.** Neuromechanical model. [A] Physical model of the body adapted from [10]: (i) Complete model. Lateral elements are colored according to the muscles they are driven by. Head and neck muscles are driven by the head motorneuron circuit (gray) (see panel B(i)). The rest of the body wall muscles are driven by a series of 6 repeating ventral nerve cord units (blue, orange, green, red, purple, and brown) (see panel B(ii)). (ii) One of 49 individual segments. Cross-sectional rigid rods (black), damped spring lateral elements (red), damped spring diagonal elements (blue). [B] Neuromuscular model. Dorsal and ventral lateral elements from the physical body represented in gray on the top and bottom, respectively. Dorsal and ventral staggered muscle arrangement. Muscle force is distributed across all lateral elements they intersect. (i) Head neuromuscular unit includes SMD (black) and RMD (gray) motorneurons that connect to muscles on each side. SMD-class neurons receive stretch-receptor input from self and posterior region covered by black process. (ii) One of 6 repeating VNC neuromuscular units, derived from a statistical analysis of the connectome [3]. Each unit includes one dorsal and two ventral B- (blue) and D-class (magenta) motorneurons that connect to muscles on each side. B-class neurons receive stretch-receptor input from anterior region covered by blue process [6]. Circuits include all chemical synapses (arrows), gap junctions (connections with line endings), and neuromuscular junctions.

93 sixfold symmetric IL1 [1]. Of these, only four of them (RMD, RME, SMB, SMD) innervate both  
 94 head muscles and neck muscles; the rest innervate either only the head region (IL1, RMF, RMH,  
 95 URA) or only the neck region (RIM, RIV, RMG). Given the parallels between SMB and SMD, and  
 96 between RMD and RME, our model considers only the SMD and RMD motorneurons for the  
 97 head motorneuron circuit. We used the connectome data to identify the chemical and electrical  
 98 synapses connecting the two motorneurons and how they innervate head and neck muscles  
 99 (Fig. 1B(i)). SMD and RMD motorneurons drive head and neck muscles,  $m = [1, 6]$ , according  
 100 to:  $I_{NMJ,m}^k = w_{NMJ,SMD} S_{SMD} + w_{NMJ,RMD} S_{RMD}$ . We constrained the sign of their neuromuscular  
 101 junctions using data from the expression of neurotransmitters: SMD and RMD neuromuscular  
 102 junctions are both excitatory [21].

### 103 Repeating ventral nerve cord circuit

104 The rest of the muscles in the body are driven by eight classes of motor neurons: AS, DA,  
 105 DB and DD innervate the dorsal body wall muscles and VA, VB, VC and VD innervate the  
 106 ventral muscles. Of the VNC motorneurons, only the B- (DB and VB) and D- (DD and VD)

1207 classes have been shown to be involved in forward locomotion, so our model includes them  
1208 only [22, 23, 24, 25]. As motor neuron connectivity data is incomplete for the posterior half  
1209 of the worm [1, 26], we relied on a statistical analysis of the motoneurons in relation to the  
1210 position of the muscles they innervate to model a repeating neural unit along the VNC [3]. When  
1211 specialized to the B-class and D-class motor neurons, this leads to the circuit architecture shown in  
1212 Figure 1B(ii). We model 6 such repeating neural units along the VNC, with identical parameters.  
1213 Previous models have typically also included these motoneurons when modeling forward  
1214 locomotion [10], but they have included only a fraction of the known connections between them  
1215 and the neural units have not been identical. D- and B-class motoneuron drive body wall muscles  
1216 posterior to the head and neck,  $m = [7, 24]$ , according to:  $I_{\text{NMJ},m}^k = w_{\text{NMJ},B}S_B + w_{\text{NMJ},D}S_D$ . Finally,  
1217 because the B-class motor neurons are known to be cholinergic and therefore excitatory and the  
1218 D-class motor neurons are GABAergic and therefore inhibitory [21, 27], we constrain the signs of  
1219 their neuromuscular junctions accordingly.

## 1220 Neural model

1221 Following electrophysiological studies in *C. elegans* [28, 29] and previous modeling efforts [30, 31],  
1222 all motoneurons were modeled as isopotential nodes with the ability to produce regenerative  
1223 responses, according to:

$$\tau_i \frac{dy_i}{dt} = -y_i + \sum_{j=1}^N w_{ji} \sigma(y_j + \theta_j) + \sum_{j=1}^N g_{ji} (y_j - y_i) + I_{\text{SR},i} \quad (0.2)$$

1224 where  $y_i$  represent the membrane potential of the  $i^{\text{th}}$  neuron relative to its resting potential,  $\tau_i$   
1225 is the time constant,  $w_{ji}$  corresponds to the synaptic weight from neuron  $j$  to neuron  $i$ , and  $g_{ji}$   
1226 as a conductance between cell  $i$  and  $j$  ( $g_{ji} > 0$ ). The model assumes chemical synapses release  
1227 neurotransmitter tonically and that steady-state postsynaptic voltage is a sigmoidal function  
1228 of presynaptic voltage [32, 33, 34],  $\sigma(x) = 1/(1 + e^{-x})$ , where  $\sigma(x)$  is the synaptic potential or  
1229 output of the neuron. The chemical synapse has two parameters:  $\theta_j$  is a bias term that shifts  
1230 the range of sensitivity of the output function, and  $w_{ji}$  represents the strength of the chemical  
1231 synapse. Electrical or gap junctions between *C. elegans* neurons are common. In line with previous  
1232 models [31, 34, 35], the model assumes electrical synapses can be modeled as bidirectional  
1233 ohmic resistances. As we have shown previously [36], this neural model has the capacity to  
1234 reproduce qualitatively the range of electrophysiological properties observed so far in *C. elegans*  
1235 neurons [28, 29]. The model can reproduce the passive activity that has been observed in some  
1236 neurons, like for example, AVA. Through the increase of the strength of the self-connection ( $>4$ ,  
1237 see [37]), the model is also capable of reproducing the bistable potentials found in some neurons,  
1238 like, for example RMD.

## 1239 Stretch receptors

1240 Mechanosensitive stretch receptor channels have long been postulated to exist in motoneurons.  
1241 There is evidence that supports their existence in interneurons [38, 39], as well as more recently  
1242 in VNC motoneurons as well [6].

1243 In the head motoneuron circuit, the SMD class has long undifferentiated processes that  
1244 are distal to the regions where neuromuscular junctions are situated, before they eventually  
1245 terminate, which have been postulated to be stretch sensitive [1]. We model SMD-class  
1246 motoneuron stretch receptors as a relatively long-range connection spanning the neck muscles  
1247 and the muscles associated with the first VNC neural unit ( $m = [4, 9]$ ) (Fig. 1B(i)), with the effect  
1248 that the head and neck regions bend in the same direction and shortly after the bending of the  
1249 neck and anterior-most body region. The stretch-receptor current for the SMD-class motoneuron  
1250 sums over contributions from a total of 14 mechanical elements associated with those muscles,

$$I_{\text{SR,SMD}}^k = \sum_{s=7}^{21} h_s^k \quad (0.3)$$

151 In the repeating neural units of the ventral nerve cord, the B-class is one motoneuron that has  
152 been postulated to mediate stretch-receptor feedback from the body. The long undifferentiated  
153 processes running posteriorly have led previous models to assume stretch receptors covered a  
154 wide range of muscle cells and that proprioceptive information traveled anteriorly. However,  
155 more recent experimental work demonstrated that the effect has a much shorter range than  
156 previously assumed and is in fact directed posteriorly, since the activity of each VB and DB motor  
157 neuron is activated by ventral and dorsal bending of a more anterior region, respectively [6]. In  
158 light of this evidence, we model B-class motoneuron stretch receptors as short-range connections  
159 from the lengths of anterior muscles to the immediately posterior B-class motor neurons, with the  
160 effect that posterior body regions are encouraged to bend in the same direction and shortly after  
161 the bending of a neighboring anterior region (Fig. 1B(ii)). The stretch-receptor current for the  
162 B-class motoneuron in unit  $n$  on the  $k$ th side,  $I_{\text{SR,B}_n}^k$ , sums over contributions from the  $S = 6$   
163 mechanical elements anterior to the anterior-most muscle that neuron innervates ( $S_{0,n}$ ):

$$I_{\text{SR,B}_n}^k = \frac{1}{S} \sum_{s=S_{0,n}-1-S}^{S_{0,n}-1} h_s^k \quad (0.4)$$

164 The proposed mechanosensitive channels in these processes respond to the changes in length  
165 associated with body bending. In line with previous work [10], stretch receptors are modeled as  
166 a weighted linear function of muscle length,

$$h_s^k = \frac{L_{L,s}^k - L_{0L,s}}{L_{0L,s}} \quad (0.5)$$

167 where  $L_{0L,s}$  is the segment rest length and  $L_{L,s}^k$  is the current length of the  $k$ th side  
168 (dorsal/ventral) of the  $s$ th segment. In line with recent findings [6], we allow the stretch receptor  
169 conductance to generate a depolarizing response to compression and a polarizing response to  
170 stretch, relative to the local segment resting length.

## 171 Numerical methods

172 The model was implemented in C++ and was solved by Euler integration with a 1 ms step.

## 173 Evolutionary algorithm

174 Unknown model parameters were adjusted using a real-valued evolutionary algorithm [6]. A  
175 naïve parameterization of our model would contain over 400 muscle, neural and stretch  
176 receptor parameters. However, it makes little sense to work directly with such a large set  
177 of unconstrained parameters. Instead, we imposed a variety of symmetries on the model in  
178 order to reduce the number of parameters. We assumed: (a) dorsal/ventral symmetry in the  
179 parameters where possible; (b) that the parameters in each VNC neural unit were identical;  
180 and (c) that neurons from the same class had identical parameters. Altogether, the model  
181 has 30 free parameters. 4 Biases, 4 time-constants, 4 self-connections, and 4 neuromuscular  
182 junctions, one for each motoneuron class (class). 2 stretch-receptor gains for SMD and B  
183 stretch-receptors. In the head motoneuron circuit, weights for: 3 chemical synapses (synapses  
184 between SMD motoneurons, synapses from SMD to RMD motoneurons, synapses between  
185 RMD motoneurons); 2 gap junctions (synapse between RMD motoneurons, synapses between  
186 SMD and RMD). In the repeating VNC neural unit, weights for: 3 chemical synapses (synapses  
187 from B- to D- motoneurons in the same side, synapses from B- to D- motoneurons on

188 opposite sides, and synapse between D- motorneurons); 1 gap junction within the unit (synapse  
189 between D- class motorneurons); 3 gap junctions across units (synapses across neighboring  
190 D-class motorneurons, synapses across neighboring B-class neurons, synapse on neighboring  
191 B-class neurons on opposite sides). Some parameters were constrained to match experimental  
192 observations. Specifically, the self-connection for RMD was constrained to  $> 4$  to force the  
193 model neuron to be bistable as observed experimentally [29] and neuromuscular junctions  
194 were constrained to be positive or negative depending on data from the expression of their  
195 neurotransmitters.

196 In order to evaluate the fitness of a solution, we measured the locomotion efficiency of  
197 the entire neuromechanical model. Specifically, we optimized the Euclidean distance from the  
198 location of the center of the model worm's body at the beginning of a trial to the location of  
199 its center at the end of the trial (duration 50 simulated seconds).

## 200 Results

### 201 Evolving locomotion

#### 202 Model reliably evolves to match the worm's speed

203 In order to identify circuits that produced forward locomotion, we ran the evolutionary algorithm  
204 100 times using different random seeds. The fitness of the model worm was evaluated to  
205 match the worm's average velocity on agar ( $v = 0.22\text{mm/sec}$ , based on the ranges reported  
206 experimentally [40, 41, 42, 43]). From each evolutionary run, we selected the best individual. As  
207 our main interest was to identify networks capable of closely matching the worm's behavior,  
208 we focused only on the highest performing subset of solutions, namely those networks having  
209 a fitness score of at least 0.95 ( $n = 46$ ). All solutions in this subset generated forward thrust by  
210 means of a dorsoventral undulation of the body. All further analysis was limited to this ensemble  
211 of solutions.

#### 212 Solutions in the ensemble reproduce characteristic features of worm's movement

213 The behavior of the models match not only the speed of the worm, but also the overall qualitative  
214 kinematics of forward movement. When placed on agar, the models in the ensemble initiate  
215 dorsoventral oscillations in the head and propagate them posteriorly, generating thrust against  
216 their environment, propelling themselves forward (see movie in Supplementary materials). The  
217 models can do this robustly, regardless of the initial state and posture of the worm, including from  
218 a straight posture. The movement of the model worms resembles the worm's characteristic  
219 frequency and its wavelength on agar. The ensemble of high-performance solutions locomote  
220 with frequencies in the range [0.34, 0.43] and wavelengths in [0.70, 0.96], which are within the  
221 range of what has been described in the literature: [0.25, 0.58] [16, 40, 42, 43, 44, 45] and [0.45,  
222 0.83] [16, 40, 42, 43, 44, 45, 46, 47, 48, 49], respectively. That the solutions in the ensemble reproduce  
223 characteristic features of the worm's movement that they were not evolved to match suggests  
224 the model captures fundamental principles of the neuromechanical basis for the behavior in the  
225 worm.

### 226 Individual Solution

227 In order to understand how oscillations are generated and propagated in the model worms, we  
228 first consider the operation of one representative individual solution in detail.

#### 229 Head motorneuron circuit can generate oscillations using stretch-receptor feedback

230 The model makes no explicit a priori assumption about where oscillations should originate.  
231 As with the worm, curvature along the body of the model worm over time during forward

232 locomotion suggests the oscillation originates in the head and is propagated backwards (Fig. 2A).  
233 In order to test whether the head motoneuron circuit can generate oscillations, we silenced  
234 motoneurons in the ventral nerve cord. Even in the absence of oscillatory activity in the VNC,  
235 the head could still oscillate (Fig. 2B).

236 During regular forward locomotion, motoneurons in the head circuit of the model worm  
237 oscillate (Fig. 2C). How are these oscillations generated? To address this question, we first  
238 silenced stretch-receptors feedback in the head. When stretch-receptors are silenced, the neural  
239 oscillations in the head circuit cease. Therefore, despite circuit's capacity to generate intrinsic  
240 network oscillations, the model worm produces oscillations robustly through stretch-receptor  
241 feedback. As far as we are aware, such a reflexive pattern generator hypothesis for oscillations  
242 in the head motoneuron circuit has not yet been considered for the worm.

243 In order to understand how the oscillation is generated through stretch-receptor feedback, we  
244 consider the neural traces of the head motoneurons, stretch-receptor feedback, muscle activation,  
245 and posture of the body over time during a full cycle of locomotion (Fig. 2C-E). At the start of a  
246 cycle (stage i), the head and neck sections are straight (Fig. 2Di), SMD's undifferentiated process  
247 is stretched and compressing, SMDD is off and RMDD is on (Fig. 2Ei). RMD activates the dorsal  
248 head and neck muscles and inhibits the contralateral RMDV motoneuron. As a result, the dorsal  
249 head and neck segments contract, while the ventral segments expand, leading to a dorsal head  
250 sweep, and the start of stage ii (Fig. 2Eii). Dorsal contraction in the anterior region of the body  
251 leads to activation of the SMDD motoneuron through stretch-receptor feedback, which inhibits  
252 SMDV and excites RMDV, causing RMDV to deactivate. Deactivation of RMDV allows the dorsal  
253 muscle to begin to relax, and leads to stage iii (Fig. 2Eiii). Stage iii is dorsoventrally symmetric  
254 to stage i: the posture of the head and neck are straight, but the state of the neurons are flipped  
255 in the dorsoventral dimension. SMDD is now on, and as a result SMDV is off and RMDV is on,  
256 which results in RMDD being off. This means the ventral muscles are contracting and the dorsal  
257 muscles are relaxing, leading to a ventral head sweep, and the start of stage iv (Fig. 2Eiii). Stage  
258 iv is dorsoventrally symmetric to stage ii: the relaxing dorsal segments leads to inactivation of  
259 SMDD, which ceases to inhibit SMDV and ceases to excite RMDV. Again together re-activation of  
260 SMDV and re-inactivation of RMDV lead to the re-activation of RMDD, which leads to the dorsal  
261 muscles contracting again, and the head and neck posture to get back to straight.

## 262 Oscillatory wave can be propagated posteriorly through stretch receptor feedback and 263 without bistable motoneurons

264 How is the oscillation that is generated in the head then propagated backwards to produce the  
265 sinusoidal traveling wave responsible for forward thrust? In order to understand the operation of  
266 the repeating ventral nerve cord circuit, we start by simplifying the circuit architecture. Although  
267 neural traces suggest all motoneurons in the VNC are active, silencing D-class motoneurons  
268 does not affect locomotion performance. Silencing the B-class motoneuron or removing the  
269 stretch-receptor feedback causes the propagation of the wave to cease. This suggests we can  
270 simplify this circuit to only the B-class motoneurons for analysis of the wave propagation.  
271 With this simplification, the operation of the ventral nerve cord circuit is straightforward. As  
272 the length of the segment anterior to the neural unit compresses, the stretch receptor excites the  
273 motoneuron, activating the muscle, and ultimately causing the contraction of its own segment.  
274 We can see this on the ventral side in stages ii and iii, and on the dorsal side on stages iv and i  
275 (Fig. 3, panels B and C). Therefore, B-class motoneurons with input from stretch-receptors with  
276 information about the length of the anterior regions of the body are the primary drivers of the  
277 propagation of the rhythmic wave in this solution. Interestingly, B-class motoneurons are not  
278 bistable. Therefore, unlike previous modeling work [10], bistable motoneurons are not essential  
279 for sustaining proprioceptively driven dorsoventral undulations in the model. However, there  
280 are two other components that play roles in the propagation of the wave: the inter-segmental gap  
281 junctions, and the mechanics of the body. We characterize the contribution of each component  
282 individually next.



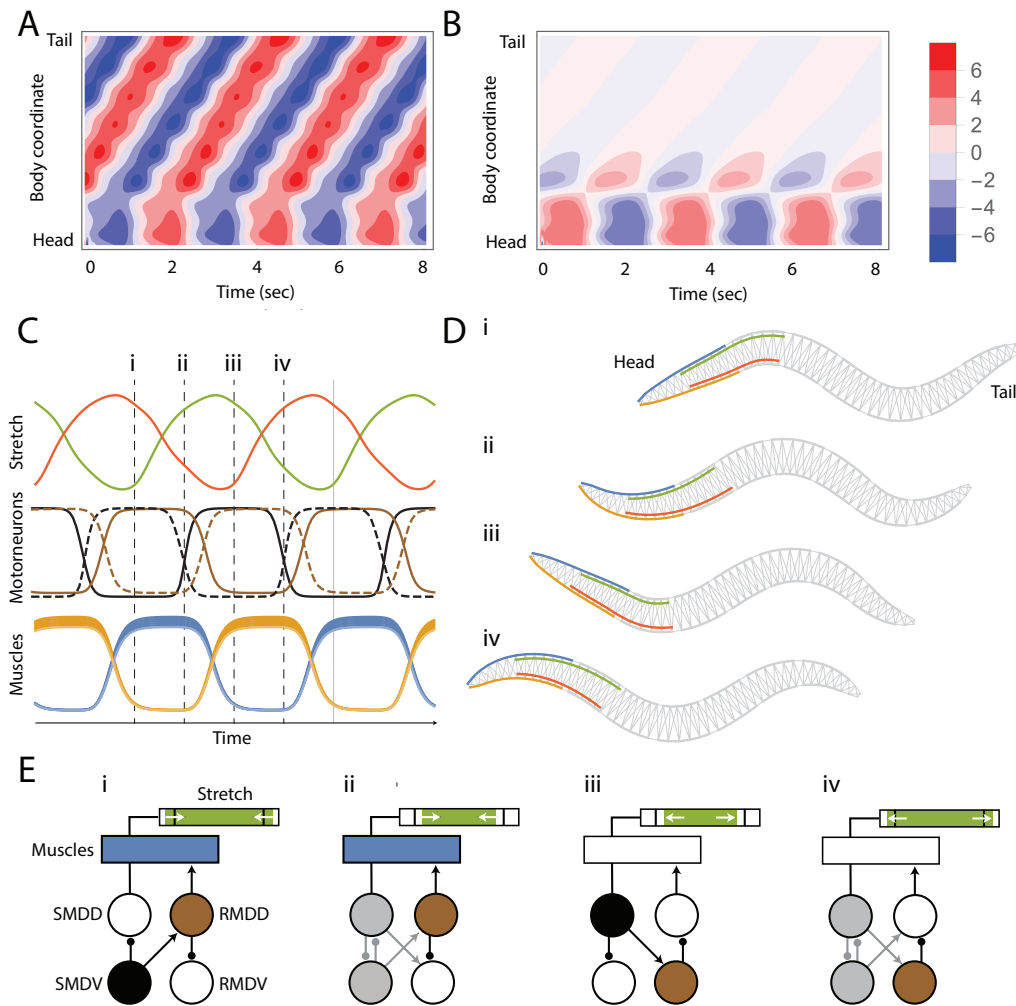

**Figure 2.** Oscillations in the head motorneuron circuit. [A] Kymogram during normal operation: Oscillation originates in the head and travels posteriorly. [B] Kymogram with VNC motorneurons silenced: Dorsoventral bends persist in head and neck. [C] Traces from stretch receptors, motoneurons, and muscles. Green/red traces dorsal/ventral stretch receptors. Black/brown traces SMD/RMD neural activity. Solid/dashed lines represent dorsal/ventral motoneurons. Blue/orange represents muscle activity from the 6 head and neck dorsal/ventral muscles. Activity is cyclic so four points are chosen in the cycle: i-iv. [D] Postures at the four instances of time selected in panel C. Dorsal/ventral head and neck muscles represented in blue/orange. Dorsal/ventral undifferentiated processes providing stretch information represented in green/red. [E] Mechanics of oscillation. Green bar represents amount of stretch/contraction in the dorsal undifferentiated process with respect to resting state (black vertical line). White arrows represent whether the process is stretching or compressing. Blue rectangle represents the dorsal head and neck muscles. Only dorsal muscles and stretch receptors are shown. The circles below represent the motoneurons. Muscles/neurons are filled in with color when they are contracted/activated and no color when they are relaxed/inactivated. The shade of gray represents the SMD neuron mid-activation. SMD motoneurons are shown in black and RMD motoneurons are shown in brown. Synapses appear only when they are in use.

### 283 Inter-unit gap junctions dampens curvature

284 The propagation of the oscillatory wave from the head to the first segment of the ventral nerve  
 285 cord occurs through stretch receptors exclusively, as there are no direct synapses between the head  
 286 motorneuron circuit and the ventral nerve cord motoneurons. However, the rest of the ventral

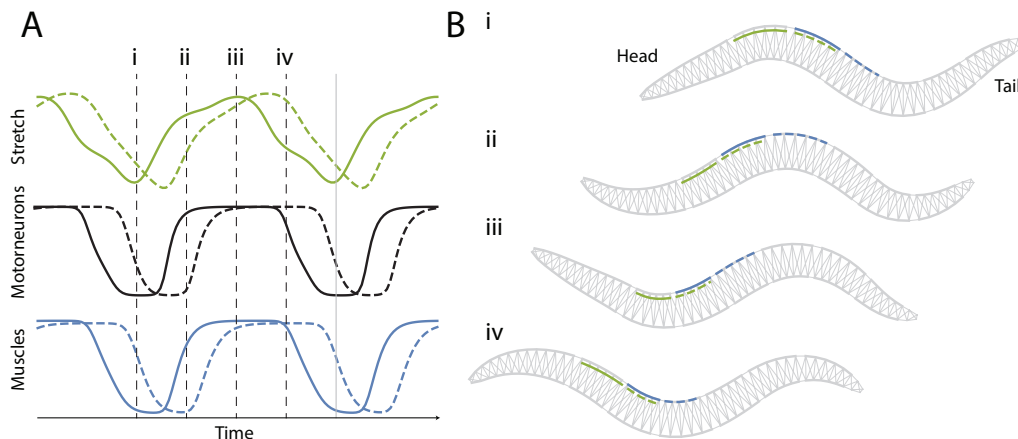

**Figure 3.** Wave propagation through stretch reception. [A] Traces from the dorsal stretch receptors (green), DB motoneurons (black), and dorsal muscles (blue) in two neighboring VNC neural units: second (solid) and third (dashed). The activity is cyclic so the same four unique points used for Figure 2 were chosen to analyze the wave propagation: i-iv (vertical dashed lines). [B] Worm postures at the four instances of time selected in panel A. The second VNC neural unit receives dorsal stretch receptor input from the solid green region and innervates the muscles in the solid blue region. The third VNC neural unit (posterior to the second), receives dorsal stretch receptor input from the dashed green region and innervates the muscles in the dashed blue region.

287 nerve cord units are interconnected by electrical gap junctions between neighboring B-cells (see  
 288 Fig. 1B). What role do the gap junctions play in transferring the wave posteriorly from the first  
 289 ventral nerve cord to the rest of them? When we silenced gap junctions between neighboring  
 290 units, the wave still travelled posteriorly. Interestingly, the amplitude of the dorsoventral  
 291 curvature increased by 22%. This suggests gap junctions are responsible for dampening the  
 292 strength of the curvature. This dampening is functional for forward locomotion: without inter-  
 293 unit gap junctions, the speed of the model worm dropped to 88.7% of its original speed. In  
 294 terms of the worm's movement, although the frequency of the oscillations remained relatively  
 295 unaffected, the wavelength became smaller: from 0.81 to 0.68. Altogether, this suggests that  
 296 when the wave travels purely through stretch receptors, it travels fast and strong, and the gap  
 297 junctions between neighboring units act to slow down and dampen the wave through tighter  
 298 communication with the motoneurons. Altogether, while the inter-unit gap junctions play a role  
 299 in the propagation of the wave, they are not essential for producing forward movement.

### 300 Wave also propagates through the mechanical body

301 One of the benefits of a neuromechanical model is that we can study the effect of the mechanical  
 302 properties of the body on the operation of the behavior. So what role does the body mechanics  
 303 play in the wave propagation? In order to address this question, we silenced the motoneuron  
 304 activity of each neural unit individually, including the incoming stretch receptor feedback, and  
 305 the gap junction connections with the unit anterior and posterior to them. Despite the silencing  
 306 of entire neural units in the VNC, the model worm could still move forward (Fig. 4A). That is,  
 307 the model worm can recover the traveling wave in the absence of the ventral nerve units from  
 308 the passive propagation of the wave through the mechanical body. This is because mechanical  
 309 curvature in one area of the worm forces curvature of neighboring segments. The combination  
 310 of stretch-receptor feedback and passive mechanical propagation is sufficiently strong that even  
 311 entirely disabling two adjacent VNC neural units does not impair the ability of a posterior VNC  
 312 unit from picking up the remains of the traveling wave and re-establishing regular dorsoventral  
 313 undulations (Fig. 4B).

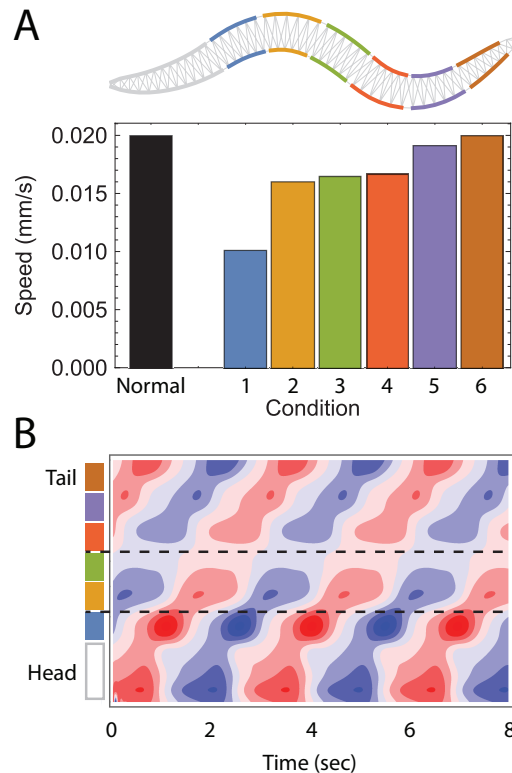

**Figure 4.** Role of biomechanics in the propagation of the wave and locomotion. [A] Speed of the worm as a result of silencing entire VNC neural units. Color coding according to the region of the body those neural units affect. Black represents the speed of the model worm under normal conditions. Propagation of the wave does not depend entirely on stretch-receptor feedback and neural activity in general. [B] Example kymogram of movement while two VNC neural units (2 and 3) have been silenced. Despite the lack of neural activity, and the lack of network oscillators in the tail, there are oscillations in the head and tail.

### 314 Ensemble of solutions

315 In the individual solution analyzed in detail, the model moved forward in the absence of  
316 an intrinsic network oscillator in either the head motorneuron circuit or the ventral nerve  
317 cord. Instead, oscillations were generated and propagated using stretch-receptor feedback with  
318 mechanical propagation playing a substantial role and electrical coupling playing a secondary  
319 role. In this section, we analyze how representative that solution is with respect to the rest of the  
320 solutions in the ensemble.

### 321 Wave originates in the head via stretch-receptor feedback or intrinsic network 322 oscillators

323 All solutions in the ensemble come to a stop when head motorneurons are silenced (orange,  
324 Fig. 5A). Yet, when VNC motorneurons are silenced, the head continues to oscillate (green,  
325 Fig. 5B), moving forward at a fraction of the speed (green, Fig. 5A). Therefore, in all solutions, the  
326 head motorneuron circuit is necessary and sufficient to produce oscillations used during forward  
327 locomotion. In 40 of the 46 solutions in the ensemble, oscillations in the head ceased when we  
328 silenced stretch-receptor feedback to the head motorneuron circuit (red, Fig. 5B). The remaining 6  
329 solutions generate intrinsic network oscillations in the absence of stretch-receptor feedback. These  
330 oscillations were sufficient to drive regular forward locomotion (red, Fig. 5A). This suggests the

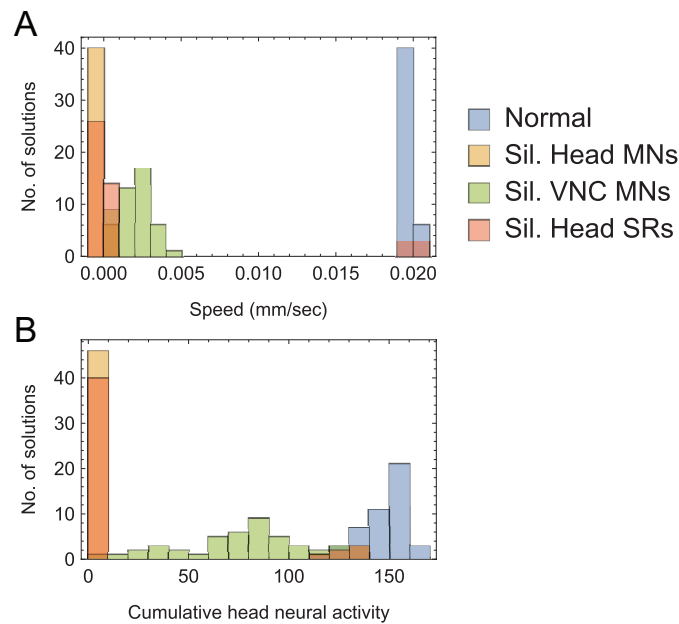

**Figure 5.** Operation of the head motorneuron circuit in the ensemble of solutions. Distribution of speed [A] and magnitude of change in neural activity in head motorneurons [B] of all model worms in the ensemble under different conditions: Normal locomotion (blue), when head motorneurons are silenced (orange), when VNC motorneurons are silenced (green), when head stretch-receptor feedback is silenced (red).

331 architecture of the head motorneuron circuit can generate oscillations to drive forward locomotion  
 332 equally well either through intrinsic network oscillations or through stretch-receptor feedback. In  
 333 both types of solutions, both SMD and RMD motorneurons were essential for producing forward  
 334 movement throughout the ensemble.

### 335 Oscillatory wave is propagated backwards through stretch receptor feedback

336 The way the wave is propagated backwards in the ensemble of solutions resembles closely that of  
 337 the model worm analyzed individually. In order to analyze wave propagation in the ensemble of  
 338 solutions, we silenced the main components of the VNC while measuring the speed of the worm  
 339 as well as the average magnitude of the dorsoventral bends along the ventral nerve cord region of  
 340 the body (Fig. 6). We summarize the main results ahead. First, the B-class motorneuron is essential  
 341 for forward locomotion in all solutions. Silencing B-class motorneurons eliminates dorsoventral  
 342 rhythmic patterns along the body and results in model worms coming to a full stop. Second,  
 343 B-class motorneurons did not evolve to be bistable in any of the solutions. Therefore, bistable  
 344 motorneurons are not essential for sustaining proprioceptively driven dorsoventral undulations  
 345 in the model. Third, silencing stretch-receptor feedback input into the B-class motorneurons has a  
 346 similar effect as silencing the B-class motorneuron altogether. Therefore, as with the model worm  
 347 analyzed individually, stretch receptor feedback is essential for propagating the wave posteriorly.  
 348 Fourth, in 41 of the 46 solutions in the ensemble, the D-class motorneuron was not essential  
 349 for forward locomotion. In these solutions, silencing the D-class motorneurons does not affect  
 350 speed or dorsoventral bends. In the remaining 5 solutions, the D-class is involved in contralateral  
 351 inhibition and is essential for wave propagation. Fifth, the inter-unit neighboring gap junctions  
 352 play a minor role in the propagation of the wave. Removing neighboring gap junction augments  
 353 the strength of the curvature, yet this increase in curvature leads to impaired movement. Finally,  
 354 the biomechanics of the body alone plays a substantial role in propagating the wave posteriorly.  
 355 Silencing entire neural units in the VNC does not entirely disrupt propagation of the wave

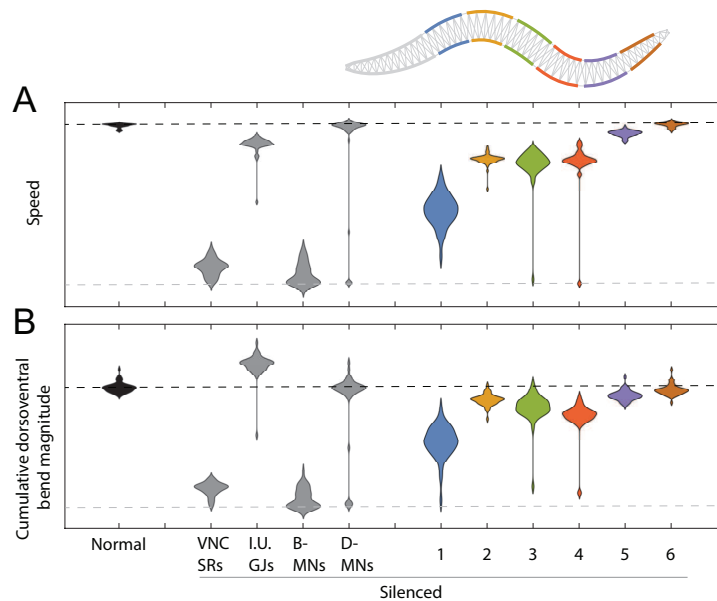

**Figure 6.** Operation of the ventral nerve cord in the ensemble of solutions. Distribution of speed [A] and magnitude of dorsoventral bends [B] of all model worms in the ensemble under different conditions: Normal locomotion (black), when VNC stretch-receptor feedback, interunit gap junctions, B-class, and D-class motorneurons are silenced independently (gray), and when an entire neural unit is silenced (colored according to position along the body). The black dashed lines represents the value expected of a normally moving model worm; the gray dashed line represents the value expected of a non-moving model worm.

356 posteriorly. Although silencing entire neural units affects the speed, the model worms still move  
 357 forward. As with the solution analyzed individually, impairing anterior units has a larger effect  
 358 than impairing posterior units.

## 359 Discussion

360 We have presented a fully integrated, biologically and physically grounded model that accounts  
 361 for *C. elegans* locomotion on agar. The model was motivated by three main factors: (a) the recent  
 362 findings regarding the range and directionality of local body curvature on motoneurons [6];  
 363 (b) the statistical analysis of the repeating structure of the VNC [3]; and (c) the absence of  
 364 a biologically-grounded head motorneuron circuit in current models of forward locomotion.  
 365 With these biological constraints provided, we used an evolutionary algorithm to systematically  
 366 explore the space of possibilities for generating locomotion. We discuss ahead the key insights  
 367 revealed from the analysis of evolved solutions.

368 First, we have demonstrated that a model of the head motorneuron circuit with SMD and  
 369 RMD alone is sufficient to generate oscillations that can drive dorsoventral undulations in the  
 370 head and neck. Analysis of the variations in the ensemble of solutions revealed two possible  
 371 mechanisms: an intrinsic network oscillator and an oscillator driven by stretch-receptor feedback  
 372 with information about the length of the region posterior to the SMD motorneuron. The latter  
 373 mechanism for the generation of oscillations in the head motorneuron circuit had not been  
 374 demonstrated in the literature until now. Furthermore, the co-existence of both mechanisms in  
 375 the worm would be feasible and likely to increase its robustness.

376 Second, we have demonstrated that a model with short-range and posteriorly directed  
 377 proprioceptive feedback in the VNC is sufficient to propagate the wave along the body and  
 378 produce forward locomotion. A key component in our model is that we allow the stretch receptor

379 conductance to generate a depolarizing response to compression and a polarizing response to  
380 stretch, relative to the local segment resting length, in line with recent findings [6]. A detailed  
381 analysis of the solutions revealed five key mechanisms for sustaining the proprioceptively  
382 driven dorsoventral undulations in the model. (a) The dorsoventral undulation generated in  
383 the head motorneuron circuit is propagated posteriorly to the VNC, despite the lack of direct  
384 synapses between the head motorneurons and VNC motorneurons, through stretch-receptor  
385 feedback from the anterior-most VNC neural unit. (b) The wave is propagated along the rest  
386 of the VNC neuromuscular units primarily through stretch-receptor feedback from the region  
387 immediately anterior to it. (c) Despite the primarily role of stretch-receptor feedback, the inclusion  
388 of a biomechanical model revealed that the passive mechanics of the body play a substantial  
389 role in the propagation of the undulation, in the absence of entire subregions of the VNC. (d)  
390 Bistable motorneurons are not necessary for sustaining the proprioceptively driven dorsoventral  
391 undulations in the model. (e) The contribution from the inter-unit gap junctions was relatively  
392 minor, serving mostly to dampen curvature. All of these postulated mechanisms would be  
393 promising to investigate further experimentally.

394 Despite the breadth of knowledge about the neurobiology, anatomy and physics of *C. elegans*,  
395 there are still a number of unanswered questions about the neuromechanical basis of one  
396 of its most basic behaviors. Our model proposes a head and VNC motorneuron circuit that  
397 accounts for forward locomotion. Furthermore, we demonstrate a methodology to systematically  
398 explore different mechanisms that match behavior given biological assumptions. Further work  
399 will involve matching the integrated neuromechanical model to a broader range of behavioral  
400 data, including the effect of optogenetic manipulations on behavior. Ultimately, improving our  
401 understanding of forward locomotion will allow us to study more complex behaviors that may  
402 require contributions from additional neural subcircuits.

## 403 Acknowledgments

404 The work in this paper was supported in part by NSF grant IIS-1524647.

## 405 References

- 406 1 JG White, E Southgate, JN Thomson, and S Brenner. The structure of the nervous system of  
407 the nematode *Caenorhabditis elegans*. *Philos Trans R Soc Lond B Biol Sci*, 275(938):327–348, 1986.
- 408 2 RH Waterston. Muscle. In WB Wood, editor, *The nematode C. elegans*, pages 281–335. Cold  
409 Spring Harbor Laboratory Press, New York, 1988.
- 410 3 G Haspel and MJ O’Donovan. A perimotor framework reveals functional segmentation in  
411 the motoneuronal network controlling locomotion in *Caenorhabditis elegans*. *J Neurosci*, 31(41):  
412 14611–14623, 2011.
- 413 4 P Babington. *C. elegans II*. Cold Spring Harbour Laboratory Press, New York, 2 edition, 1997.
- 414 5 N Tavernarakis, W Shreffler, S Wang, and M Driscoll. *unc-8*, a *deg/enac* family member,  
415 encodes a subunit of a candidate mechanically gated channel that modulates *C. elegans*  
416 locomotion. *Neuron*, 18:107–119, 1997.
- 417 6 Q Wen, MD Po, E Hulme, S Chen, X Liu, SW Kwok, M Gershow, AM Leifer, V Butler, C Fang-  
418 Yen, et al. Proprioceptive coupling within motor neurons drives *C. elegans* forward locomotion.  
419 *Neuron*, 76(4):750–761, 2012.
- 420 7 J Gjorgjieva, D Biron, and G Haspel. Neurobiology of *Caenorhabditis elegans* locomotion: where  
421 do we stand? *Bioscience*, 64(6):476–486, 2014.
- 422 8 N Cohen and T Sanders. Nematode locomotion: dissecting the neuronal–environmental loop.  
423 *Curr Opin Neurobiol*, 25:99–106, 2014.
- 424 9 M Zhen and ADT Samuel. *C. elegans* locomotion: small circuits, complex functions. *Curr Opin*  
425 *Neurobiol*, 33:117–126, 2015.
- 426 10 JH Boyle, S Berri, and N Cohen. Gait modulation in *C. elegans*: an integrated neuromechanical  
427 model. *Front Comput Neurosci*, 6:10, 2012. doi: 10.3389/fncom.2012.00010.

- 428 11 JH Boyle. *C. elegans locomotion: An integrated approach*. PhD thesis, University of Leeds, 2010.
- 429 12 N Cohen and JH Boyle. Swimming at low Reynolds number: a beginner's guide to undulatory  
430 locomotion. *Contemporary Physics*, 51:103–123, 2010.
- 431 13 E Niebur and P Erdős. Theory of the locomotion of nematodes: Dynamics of undulatory  
432 progression on a surface. *Biophys J*, 60(5):1132–1146, 1991.
- 433 14 J Lighthill. Flagellar hydrodynamics. *SIAM Rev*, 18:161–230, 1976.
- 434 15 HR Wallace. Wave formation by infective larvae of the plant parasitic nematode *Meloidogyne*  
435 *javanica*. *Nematologica*, 15(1):65–75, 1969.
- 436 16 S Berri, JH Boyle, M Tassieri, IA Hope, and N Cohen. Forward locomotion of the nematode *C.*  
437 *elegans* is achieved through modulation of a single gait. *HFSP J*, 3(3):186–193, 2009.
- 438 17 P Sauvage. *Etude de la locomotion chez C. elegans et perturbations mécaniques du mouvement*. PhD  
439 thesis, Université Paris, 2007.
- 440 18 ZF Altun and DH Hall. Muscle system, somatic muscle. In *WormAtlas*. 2009.  
441 doi:10.3908/wormatlas.1.7.
- 442 19 AV Hill. The heat of shortening and the dynamics constants of muscle. *Proc. R. Soc. London B*,  
443 126:136–195, 1938.
- 444 20 B Milligan, N Curtin, and Q Bone. Contractile properties of obliquely striated muscle from  
445 the mantle of squid (*Alloteuthis subulata*) and cuttlefish (*Sepia officinalis*). *J Exp Biol*, 200(Pt 18):  
446 2425–24236, 1997.
- 447 21 JB Rand and ML Nonet. Neurotransmitter assignments for specific neurons. In *C. elegans II*,  
448 pages 1049–1052. Cold Spring Harbour Laboratory Press, New York, 1997.
- 449 22 M Chalfie, JE Sulston, JG White, E Southgate, JN Thomson, and S Brenner. The neural circuit  
450 for touch sensitivity in *Caenorhabditis elegans*. *J Neurosci*, 5(4):956–964, 1985.
- 451 23 S Faumont, G Rondeau, TR Thiele, KJ Lawton, KE McCormick, M Sottile, O Griesbeck,  
452 ES Heckscher, WM Roberts, CQ Doe, et al. An image-free opto-mechanical system for creating  
453 virtual environments and imaging neuronal activity in freely moving *Caenorhabditis elegans*.  
454 *PLoS One*, 6(9):e24666, 2011. doi: 10.1371/journal.pone.0024666.
- 455 24 G Haspel, MJ O'Donovan, and AC Hart. Motoneurons dedicated to either forward or  
456 backward locomotion in the nematode *Caenorhabditis elegans*. *J Neurosci*, 30(33):11151–11156,  
457 2010.
- 458 25 T Kawano, MD Po, S Gao, G Leung, WS Ryu, and M Zhen. An imbalancing act: gap junctions  
459 reduce the backward motor circuit activity to bias *C. elegans* for forward locomotion. *Neuron*,  
460 72(4):572–586, 2011.
- 461 26 LR Varshney, BL Chen, E Paniagua, DH Hall, and DB Chklovskii. Structural properties of the  
462 *Caenorhabditis elegans* neuronal network. *PLoS Comput Biol*, 7(2):e1001066, 2011. doi: 10.1371/  
463 journal.pcbi.1001066.
- 464 27 SL McIntire, E Jorgensen, J Kaplan, and HR Horvitz. The gabaergic nervous system of  
465 *Caenorhabditis elegans*. *Nature*, 364(6435):337–41, 1993.
- 466 28 SR Lockery and MB Goodman. The quest for action potentials in *C. elegans* neurons hits a  
467 plateau. *Nat Neurosci*, 12(4):377–378, 2009.
- 468 29 JE Mellem, PJ Brockie, DM Madsen, and AV Maricq. Action potentials contribute to neuronal  
469 signaling in *C. elegans*. *Nat Neurosci*, 11(8):865–867, 2008.
- 470 30 EJ Izquierdo and SR Lockery. Evolution and analysis of minimal neural circuits for klinotaxis  
471 in *Caenorhabditis elegans*. *J Neurosci*, 30(39):12908–12917, 2010.
- 472 31 EJ Izquierdo and RD Beer. Connecting a connectome to behavior: an ensemble of  
473 neuroanatomical models of *C. elegans* klinotaxis. *PLoS Comput Biol*, 9(2):e1002890, 2013. doi:  
474 10.1371/journal.pcbi.1002890.
- 475 32 M Kuramochi and M Doi. A computational model based on multi-regional calcium imaging  
476 represents the spatio-temporal dynamics in a *Caenorhabditis elegans* sensory neuron. *PLoS One*,  
477 12(1):e0168415, 2017. doi: 10.1371/journal.pone.0168415.
- 478 33 TH Lindsay, TR Thiele, and SR Lockery. Optogenetic analysis of synaptic transmission in the  
479 central nervous system of the nematode *Caenorhabditis elegans*. *Nat Commun*, 2(306), 2011. doi:  
480 10.1038/ncomms1304.
- 481 34 SR Wicks, CJ Roehrig, and CH Rankin. A dynamic network simulation of the nematode  
482 tap withdrawal circuit: predictions concerning synaptic function using behavioral criteria. *J*  
483 *Neurosci*, 16(12):4017–4031, 1996.

- 484 35 JM Kunert, JL Proctor, SL Brunton, and JN Kutz. Spatiotemporal feedback and network  
485 structure drive and encode *Caenorhabditis elegans* locomotion. *PLoS Comput Biol*, 13(1):  
486 e1005303, 2017. doi: 10.1371/journal.pcbi.1005303.
- 487 36 EO Olivares, EJ Izquierdo, and RD Beer. Potential role of a ventral nerve cord central pattern  
488 generator in forward and backward locomotion in *Caenorhabditis elegans*. *Network Neuroscience*,  
489 0(ja):1–32, 2017. doi: 10.1162/NETN\_a\\_\\_00036.
- 490 37 RD Beer. On the dynamics of small continuous-time recurrent neural networks. *Adapt Behav*,  
491 3(4):469–509, 1995.
- 492 38 W Li, Z Feng, PW Sternberg, and XZS Xu. A *C. elegans* stretch receptor neuron revealed by a  
493 mechanosensitive trp channel homologue. *Nature*, 440:684–687, 2006.
- 494 39 WR Schafer. Proprioception: a channel for body sense in the worm. *Curr. Biol.*, 16:R509–R511,  
495 2006.
- 496 40 XN Shen, J Sznitman, P Krajacic, T Lamitina, and PE Arratia. Undulatory locomotion of  
497 *Caenorhabditis elegans* on wet surfaces. *Biophysical Journal*, 102(12):2772–2781, 2012. doi:  
498 10.1016/j.bpj.2012.05.012.
- 499 41 DT Omura, DA Clark, ADT Samuel, and HR Horvitz. Dopamine signaling is essential for  
500 precise rates of locomotion by *C. elegans*. *PLOS ONE*, 7(6):1–9, 06 2012. doi: 10.1371/journal.  
501 pone.0038649.
- 502 42 E Cohen, E Yemini, W Schafer, DG Feitelson, and M Treinin. Locomotion analysis identifies  
503 roles of mechanosensory neurons in governing locomotion dynamics of *C. elegans*. *Journal of*  
504 *Experimental Biology*, 215(20):3639–3648, 2012. doi: 10.1242/jeb.075416.
- 505 43 CJ Cronin, JE Mendel, S Mukhtar, YM Kim, RC Stirbl, J Bruck, and PW Sternberg. An  
506 automated system for measuring parameters of nematode sinusoidal movement. *BMC*  
507 *Genetics*, 6(5), 2005. doi: 10.1186/1471-2156-6-5.
- 508 44 C Fang-Yen, M Wyart, J Xie, R Kawai, T Kodger, S Chen, and ADT Samuel. Biomechanical  
509 analysis of gait adaptation in the nematode *Caenorhabditis elegans*. *Proceedings of the National*  
510 *Academy of Sciences of the United States of America*, 107(47):20323–20328, 2010. doi: 10.1073/pnas.  
511 1003016107.
- 512 45 J Karbowski, G Schindelman, CJ Cronin, A Seah, and PW Sternberg. Systems level circuit  
513 model of *C. elegans* undulatory locomotion: mathematical modeling and molecular genetics. *J*  
514 *Comput Neurosci*, 24(3):253–276, 2008.
- 515 46 JT Pierce-Shimomura, BL Chen, JJ Mun, R Ho, R Sarkis, and SL McIntire. Genetic analysis  
516 of crawling and swimming locomotory patterns in *C. elegans*. *Proceedings of the National*  
517 *Academy of Sciences of the United States of America*, 105(52):20982–20987, 2008. doi: 10.1073/  
518 pnas.0810359105.
- 519 47 E Yemini, T Jucikas, LJ Grundy, AEX Brown, and WR Schafer. A database of *C. elegans*  
520 behavioral phenotypes. *Nature Methods*, 10(9):877–879, 2013. doi: 10.1038/nmeth.2560.
- 521 48 A Vidal-Gadea, S Topper, L Young, A Crisp, L Kressin, E Elbel, and JT Pierce-Shimomura.  
522 *Caenorhabditis elegans* selects distinct crawling and swimming gaits via dopamine and  
523 serotonin. *Proceedings of the National Academy of Sciences of the United States of America*, 108  
524 (42):17504–17509, 2011. doi: 10.1038/nmeth.2560.
- 525 49 VJ Butler, R Branicky, E Yemini, JF Liewald, A Gottschalk, RA Kerr, DB Chklovskii, and  
526 WR Schafer. A consistent muscle activation strategy underlies crawling and swimming in  
527 *Caenorhabditis elegans*. *Journal of The Royal Society Interface*, 12(102), 2015. doi: 10.1098/rsif.2014.  
528 0963.
